# Supplementary material
Source: PubMed Central journal article supplement (PMC3393487)
Supplement: supp_194.14.3627_TableS1-S2.pdf [file supp_194.14.3627_TableS1-S2.pdf]

**Supplementary Table S1.** C2-substituted monocarboxylate substrates X-CHR-COO<sup>-</sup>.

| Substrate                      | X  | R                                                                                   | X=NH <sub>3</sub> <sup>+</sup> aa analog | Hydrophobicity of R (7) | Size of R | pK   |
|--------------------------------|----|-------------------------------------------------------------------------------------|------------------------------------------|-------------------------|-----------|------|
| glycolate                      | OH |                                                                                     |                                          |                         |           | 3.82 |
| glyoxylate                     | O  | —H                                                                                  | glycine                                  | 0.48                    | -1.90     | 3.32 |
| acetate                        | H  |                                                                                     |                                          |                         |           | 4.76 |
| lactate                        | OH |                                                                                     |                                          |                         |           | 3.86 |
| pyruvate                       | O  | —CH <sub>3</sub>                                                                    | alanine                                  | 0.62                    | -1.46     | 2.50 |
| propionate                     | H  |                                                                                     |                                          |                         |           | 4.87 |
| α-hydroxyisovalerate           | OH | 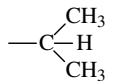   | valine                                   | 1.08                    | -0.59     |      |
| α-ketoisovalerate              | O  |                                                                                     |                                          |                         |           | 4.77 |
| isovalerate                    | H  |                                                                                     |                                          |                         |           |      |
| α-hydroxyisocaproate           | OH |    | leucine                                  | 1.06                    | -1.16     |      |
| α-ketoisocaproate              | O  |                                                                                     |                                          |                         |           | 4.84 |
| isocaproate                    | H  |                                                                                     |                                          |                         |           |      |
| 2-hydroxy-4-methylthiobutyrate | OH |    | methionine                               | 0.64                    | -1.16     |      |
| 2-keto-4-methylthiobutyrate    | O  |                                                                                     |                                          |                         |           |      |
| 4-methylthiobutyrate           | H  |                                                                                     |                                          |                         |           |      |
| phenylglycolate                | OH |   | phenylglycine                            |                         |           | 3.41 |
| phenylglyoxylate               | O  |                                                                                     |                                          |                         |           | 2.15 |
| phenylacetate                  | H  |                                                                                     |                                          |                         |           | 4.31 |
| phenyllactate                  | OH |  | phenylalanine                            | 1.19                    | 1.15      |      |
| phenylpyruvate                 | O  |                                                                                     |                                          |                         |           | 4.66 |
| phenylpropionate               | H  |                                                                                     |                                          |                         |           |      |
| indole-3-lactate               | OH |  | tryptophan                               | 0.81                    | 2.45      |      |
| indole-3-pyruvate              | O  |                                                                                     |                                          |                         |           | 4.77 |
| indole-3-propionate            | H  |                                                                                     |                                          |                         |           |      |

**Supplementary Table S2.** Dicarboxylate substrates of CitP.

| Common name         | Number of C atoms | OH substituent | Structural formula                                                                    | pK       |
|---------------------|-------------------|----------------|---------------------------------------------------------------------------------------|----------|
| Oxalate             | 2                 | -              | 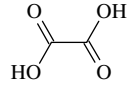   | (1) 1.23 |
|                     |                   |                | (2) 4.19                                                                              |          |
| Malonate            | 3                 | H              |    | (1) 2.83 |
|                     |                   |                | (2) 5.69                                                                              |          |
| Malate              | 4                 | OH             |    | (1) 3.40 |
|                     |                   |                | (2) 5.11                                                                              |          |
| Oxaloacetate        | 4                 | O              |    | (1) 2.22 |
|                     |                   |                | (2) 3.89                                                                              |          |
| Succinate           | 4                 | H              |    | (1) 4.16 |
|                     |                   |                | (2) 5.61                                                                              |          |
| Maleate<br>(cis)    | 4                 | H              |    | (1) 1.83 |
|                     |                   |                | (2) 6.07                                                                              |          |
| Fumarate<br>(trans) | 4                 | H              |   | (1) 3.03 |
|                     |                   |                | (2) 4.44                                                                              |          |
| Glutarate           | 5                 | H              |  | (1) 4.31 |
|                     |                   |                | (2) 5.41                                                                              |          |
| Adipate             | 6                 | H              |   | (1) 4.43 |
|                     |                   |                | (2) 5.41                                                                              |          |
